# Supplementary material for: Occupational Class Differences in Body Mass Index and Weight Gain in Japan and Finland
Source: PubMed Central journal article supplement (PMC3834282; doi:10.2188/jea.je20130023), 2013-11-05
Supplement: je-23-443-s001.pdf [file je-23-443-s001.pdf]

**eTable 1.** Distributions of Participants and Mean Body Mass Index by Background Characteristics in Japan and Finland

|                                                      | Japan    |          |          |          | Finland  |          |          |          |
|------------------------------------------------------|----------|----------|----------|----------|----------|----------|----------|----------|
|                                                      | Men      |          | Women    |          | Men      |          | Women    |          |
|                                                      | %        | BMI mean | %        | BMI mean | %        | BMI mean | %        | BMI mean |
| <b>Job strain</b>                                    |          |          |          |          |          |          |          |          |
| Low job strain                                       | 28       | 23.3     | 26       | 21.5     | 26       | 26.3     | 25       | 25.2     |
| Passive work                                         | 24       | 23.6     | 24       | 21.7     | 30       | 26.4     | 27       | 25.5     |
| Active work                                          | 23       | 23.3     | 27       | 21.3     | 25       | 26.3     | 25       | 25.1     |
| High job strain                                      | 13       | 23.1     | 11       | 21.7     | 18       | 26.9     | 21       | 25.6     |
| Missing                                              | 12       | 23.6     | 12       | 21.7     | 1        | 26.8     | 2        | 25.6     |
| <b>Working overtime</b>                              |          |          |          |          |          |          |          |          |
| No ( $\leq 40$ h/week)                               | 32       | 23.4     | 28       | 21.8     | 77       | 26.4     | 85       | 25.3     |
| Yes ( $> 40$ h/week)                                 | 49       | 23.3     | 54       | 21.4     | 21       | 26.4     | 13       | 25.3     |
| Missing                                              | 19       | 23.6     | 18       | 21.5     | 2        | 27.8     | 2        | 25.7     |
| <b>Marital status</b>                                |          |          |          |          |          |          |          |          |
| Married or cohabiting                                | 71       | 23.1     | 61       | 20.6     | 77       | 26.5     | 67       | 25.4     |
| Others                                               | 17       | 23.4     | 27       | 21.9     | 23       | 26.4     | 33       | 25.3     |
| Missing                                              | 12       | 23.4     | 12       | 21.5     | 0        | -        | 0        | -        |
| <b>Number of friends met at least once per month</b> |          |          |          |          |          |          |          |          |
| 0                                                    | 18       | 23.2     | 18       | 21.5     | 6        | 25.8     | 5        | 25.2     |
| 1-2                                                  | 29       | 23.5     | 31       | 21.5     | 32       | 26.5     | 37       | 25.4     |
| 3-5                                                  | 23       | 23.2     | 26       | 21.6     | 35       | 26.6     | 37       | 25.4     |
| 6-10                                                 | 7        | 23.4     | 5        | 21.6     | 14       | 26.1     | 12       | 25.2     |
| $\geq 11$                                            | 6        | 23.5     | 3        | 21.7     | 8        | 26.5     | 5        | 25.2     |
| Missing                                              | 17       | 23.6     | 17       | 21.5     | 5        | 26.3     | 4        | 25.3     |
| <b>Current smoker</b>                                |          |          |          |          |          |          |          |          |
| No                                                   | 50       | 23.4     | 79       | 21.6     | 72       | 26.4     | 77       | 25.4     |
| Yes                                                  | 36       | 23.3     | 5        | 21.9     | 27       | 26.3     | 23       | 25.2     |
| Missing                                              | 14       | 23.5     | 16       | 21.2     | 1        | 26.9     | 1        | 26.0     |
| <b>Physical inactivity</b>                           |          |          |          |          |          |          |          |          |
| No                                                   | 64       | 23.4     | 69       | 21.5     | 78       | 26.1     | 79       | 25.0     |
| Yes                                                  | 21       | 23.3     | 15       | 21.9     | 21       | 27.7     | 20       | 26.7     |
| Missing                                              | 15       | 23.5     | 16       | 21.2     | 1        | 27.8     | 1        | 26.8     |
| <b>Alcohol consumption</b>                           |          |          |          |          |          |          |          |          |
| 0 g per week                                         | 14       | 23.4     | 39       | 21.6     | 5        | 26.6     | 8        | 26.1     |
| 1-47 g per week                                      | 13       | 23.3     | 25       | 21.6     | 37       | 26.3     | 63       | 25.4     |
| 48-191 g per week                                    | 32       | 23.3     | 16       | 21.5     | 40       | 26.5     | 25       | 24.9     |
| $> 191$ g per week                                   | 25       | 23.4     | 2        | 21.6     | 17       | 26.5     | 3        | 26.0     |
| Missing                                              | 16       | 23.5     | 18       | 21.1     | 1        | 27.0     | 1        | 25.3     |
|                                                      | (N=1221) |          | (N=1221) |          | (N=6948) |          | (N=5778) |          |
