# Supplementary material for: Occupational Class Differences in Body Mass Index and Weight Gain in Japan and Finland
Source: PubMed Central journal article supplement (PMC3834282; doi:10.2188/jea.je20130023), 2013-11-05
Supplement: je-23-443-s002.pdf [file je-23-443-s002.pdf]

**eTable 2.** Regression Coefficients for Height by Occupational Class in Japan and Finland<sup>a</sup>

|                    | Japanese men |              | Finnish men |              | Japanese women <sup>b</sup> |             | Finnish women <sup>b</sup> |              |
|--------------------|--------------|--------------|-------------|--------------|-----------------------------|-------------|----------------------------|--------------|
|                    | $\beta$      | 95% CI       | $\beta$     | 95% CI       | $\beta$                     | 95% CI      | $\beta$                    | 95% CI       |
| Managers           | ref.         |              | ref.        |              | NA                          |             | NA                         |              |
| Professionals      | -0.79        | -0.65, -0.61 | -0.98       | -1.79, -0.17 | ref.                        |             | ref.                       |              |
| Clerical employees | -1.16        | -2.07, -0.26 | -1.33       | -2.37, -0.30 | -0.13                       | -0.75, 0.49 | -1.40                      | -1.68, -1.12 |
| Manual workers     | -1.57        | -2.61, -0.53 | -1.66       | -2.38, -0.93 | NA                          |             | -1.42                      | -1.85, -0.99 |
| p-value for trend  | 0.002        |              | <0.0001     |              | 0.646                       |             | <0.0001                    |              |
|                    | (N=2859)     |              | (N=1737)    |              | (N=1221)                    |             | (N=6948)                   |              |

<sup>a</sup>Adjusted age and age-squared<sup>b</sup>Managers and professionals combined
